# Supplementary material
Source: publisher figshare collection journal article supplement (https://wiley.figshare.com/articles/dataset/_/3558678)
Supplement: Supplementary file 1 [file 1]

**SIZEWEB Box 1.pdf**

Allometric coefficients for fresh weight  $M$  (micrograms) of enchytraeids of body length  $L$  (microns) using the linear regression  $\log(M) = a + b \times \log(L)$  (base-10 logarithms).

Unpublished data by Wim Didden (1950–2005), *personal communication* 2003.

| GENUS                                            | a      | b      |
|--------------------------------------------------|--------|--------|
| <i>Achaeta</i> Vejdovsky 1877                    | 0.6272 | 1.8546 |
| <i>Buchholzia</i> Michaelsen 1887                | 0.9708 | 1.5342 |
| <i>Cognettia</i> Nielsen & Christensen 1959      | 0.9708 | 1.5342 |
| <i>Enchytraeus</i> Henle 1837                    | 0.6584 | 2.0382 |
| <i>Enchytronia</i> Nielsen & Christensen 1959    | 0.6272 | 1.8546 |
| <i>Fridericia</i> Michaelsen 1889                | 0.7983 | 2.0110 |
| <i>Hemienchytraeus</i> Cernosvitov 1935          | 0.6584 | 2.0382 |
| <i>Hemifridericia</i> Nielsen & Christensen 1959 | 0.6272 | 1.8546 |
| <i>Henlea</i> Michaelsen 1889                    | 0.8374 | 1.9798 |
| <i>Marionina</i> Michaelsen 1889                 | 0.6584 | 2.0382 |
| <i>Mesenchytraeus</i> Eisén 1878                 | 0.8031 | 2.1869 |
| Unidentified specimens                           | 0.7730 | 1.9100 |
