# Supplementary material
Source: publisher figshare collection journal article supplement (https://wiley.figshare.com/articles/dataset/_/3558678)
Supplement: Supplementary file 2 [file 1]

## **SIZEWEB Box 2.pdf. Soil invertebrates at 135 sites.**

---

### **NEMATODA:**

*Achromadora*, *Acrobeles*, *Acrobeloides*, *Aglenchus*, *Alaimus*, *Anaplectus*, *Anguinidae*, *Aphelenchoides*, *Aphelenchus*, *Aporcelaimellus*, *Aporcelaimus*, *Bastiania*, *Cephalobidae*, *Cervidellus*, *Chromadoridae*, *Clarkus*, *Coslenchus*, *Criconematidae*, *Dauerlarvae stage*, *Diphtherophora*, *Dolichodoridae*, *Dorylaimoidea*, *Dorylaimus*, *Epidorylaimus*, *Eucephalobus*, *Eudorylaimus*, *Eumonhystera* (*Monhysteridae sensu stricto*), *Filenchus*, *Helicotylenchus*, *Heterodera*, *Hoplolaimidae*, *Longidorus*, *Malenchus*, *Meloidogyne*, *Mesodorylaimus*, *Metateratocephalus*, *Mononchidae*, *Mononchus*, *Mylonchulus*, *Neodiplogasteridae*, *Panagrolaimus*, *Paramphidelus*, *Paratrichodorus*, *Paratylenchus*, *Plectidae*, *Plectus*, *Pratylenchus*, *Prismatolaimus*, *Prodorylaimus*, *Pungentus*, *Qudsianematidae*, *Rhabditidae*, *Rhabditis*, *Rotylenchus*, *Seinura*, *Teratocephalus*, *Thonus*, *Thornematidae*, *Trichodorus*, *Tripyla*, *Tylenchidae*, *Tylencholaimus*, *Tylenchorhynchus*, *Tylenchus*, *Tylopharynx*

### **ACARINA:**

Astigmata (Astigmatic mites):

*Astigmata undiff.*, *Histiostoma*, *Rhizoglyphus*, *Schwiebea*, *Tyrophagus*

Cryptostigmata (Oribatid mites):

*Oribatida juveniles*, *Achipteria*, *Adamaeus*, *Adoristes*, *Astegistes*, *Atropacarus*, *Banksinoma*, *Belbidae*, *Berniniella*, *Brachychthoniidae*, *Brachychthonius*, *Camisia*, *Cepheus*, *Ceratoppia*, *Ceratozetes*, *Chamobates*, *Cosmochthonius*, *Damaeobelba*, *Damaeus*, *Diapterobates*, *Dissorhina*, *Eniochthonius*, *Eulohmannia*, *Eupelops*, *Euzetes*, *Galumna*, *Hemileius*, *Hermannia*, *Humerobates*, *Hypochthonius*, *Lauroppia*, *Liebstadia*, *Liochthonius*, *Medioppia*, *Metabelba*, *Micropippa*, *Microtritia*, *Minunthozetes*, *Nanhermannia*, *Nothrus*, *Odontocepheus*, *Oppeiella*, *Oppeiidae*, *Oribatella*, *Oribatula*, *Palaeacarus*, *Phauloppia*, *Phthiracarus*, *Platynothrus*, *Punctoribates*, *Quadroppia*, *Ramusella*, *Rhysotritia*, *Schelorbates*, *Sellnickochthonius*, *Spatiodamaeus*, *Steganacarus*, *Suctobelbella*, *Tectocepheus*, *Trichoribates*

Mesostigmata (Gamasid mites):

*Mesostigmata juveniles*, *Alliphis*, *Amblyseius*, *Arctoseius*, *Asca*, *Blattisocius*, *Cheiroseius*, *Cilliba*, *Cyrtolaelaps*, *Dendrolaelaps*, *Dendroseius*, *Epicriopsis*, *Gamasodes*, *Gamasolaelaps*, *Geholaspis*, *Holoparasitus*, *Hypoaspis*, *Isozercon*, *Lasioseius*, *Leioseius*, *Lysigamasus*, *Macrocheles*, *Macrochelidae*, *Nenteria*, *Pachylaelaps*, *Parasitus*, *Parazercon*, *Pergamasus*, *Phytoseiidae*, *Protodinychus*, *Prozercon*, *Pseudoparasitus*, *Rhodacarellus*, *Rhodacaridae*, *Rhodacarus*, *Trachytes*, *Uroobovella*, *Uropoda*, *Uroseius*, *Veigaia*, *Zercon*, *Zercoseius*

Prostigmata (Prostigmatid mites):

*Prostigmata undiff.*, *Anystidae*, *Balaustium*, *Bdella*, *Bdellidae*, *Coccotydeus*, *Eriophyidae*, *Erythraeidae*, *Eupodes*, *Eupodidae*, *Labidostomma*, *Ledermuelleria*, *Microtydeus*, *Nanorchestes*, *Pachygnatidae*, *Penthaleus*, *Penthalodidae*, *Pyemotes*, *Pyemotidae*, *Pygmephorus*, *Rhagidia*, *Rhagidiidae*, *Scutacaridae*, *Scutacarus*, *Siteroptes*, *Speleorchestes*, *Stigmaeidae*, *Tarsonemidae*, *Tarsonemus*, *Trombidiidae*, *Tydeidae*

***Pauropoda (myriapods):*** *Pauropoda indet.*

***Symphyla (symphylids):*** *Scutigereidae*

### **INSECTA:**

***Protura (proturans):*** Larvae

***Diplura (japygids):*** *Japygoidea undiff.*

***Collembola (springtails):***

*Anurida*, *Brachystomella*, *Ceratophysella*, *Entomobrya*, *Entomobryidae*, *Folsomia*, *Friesea*, *Hypogastrura*, *Isotoma*, *Isotomiella*, *Isotomurus*, *Lepidocyrtus*, *Megalothorax*, *Mesaphorura*, *Neanura*, *Neelides*, *Onychiurus*, *Orchesella*, *Paratullbergia*, *Parisotoma*, *Proisotoma*, *Protaphorura*, *Pseudachorutes*, *Pseudisotoma*, *Pseudosinella*, *Sminthuridae*, *Sminthurides*, *Sminthurinus*, *Sminthurus*, *Sphaeridia*, *Stenaphorurella*, *Tomocerus*, *Vertagopus*, *Willemia*

### **OLIGOCHAETA:**

***Enchytraeidae (potworms):***

*Enchytraeidae juveniles*, *Achaeta*, *Buchholzia*, *Cognettia*, *Enchytraeus*, *Enchytronia*, *Fridericia*, *Hemienchytraeus*, *Hemifridericia*, *Henlea*, *Marionina*, *Mesenchytraeus*

***Lumbricidae (earthworms):***

*Allolobophora*, *Aporrectodea*, *Eiseniella*, *Lumbricus*, *Octolasion*
